# Supplementary material for: Landslides Triggered by Medicane Ianos in Greece, September 2020: Rapid Satellite Mapping and Field Survey
Source: MDPI journal article supplement (doi:10.3390/app122312443), 2022-12-05
Supplement: s1 [file s1]

# Landslides Triggered by Medicane Ianos in Greece, September 2020: Rapid Satellite Mapping and Field Survey

Sotiris Valkaniotis <sup>1,\*</sup>, George Papathanassiou <sup>2</sup>, Vassilis Marinos <sup>3</sup>, Charalampos Saroglou <sup>3</sup>, Dimitrios Zekkos <sup>4</sup>, Vasileios Kallimogiannis <sup>3</sup>, Efstratios Karantanellis <sup>5</sup>, Ioannis Farmakis <sup>6</sup>, Georgios Zalachoris <sup>7</sup>, John Manousakis <sup>8</sup> and Olga-Joan Ktenidou <sup>9</sup>

<sup>1</sup> Department of Civil Engineering, Democritus University of Thrace, 67100 Xanthi, Greece

<sup>2</sup> Department of Geology, Aristotle University of Thessaloniki, 54124 Thessaloniki, Greece

<sup>3</sup> School of Civil Engineering, National Technical University of Athens, 10682 Athens, Greece

<sup>4</sup> Department of Civil and Environmental Engineering, University of California at Berkeley, 94720 Berkeley, USA

<sup>5</sup> Department of Earth and Environmental Sciences, University of Michigan, 48109 Ann Arbor, USA

<sup>6</sup> Department of Geological Sciences and Engineering, Queen's University, K7L 3N6 Kingston, Canada

<sup>7</sup> Omikron Kappa Consulting S.A., 15122 Athens, Greece

<sup>8</sup> Elxis Group, 10682 Athens, Greece

<sup>9</sup> Geodynamic Institute, National Observatory of Athens, 11810 Athens, Greece

\* Correspondence: svalkani@civil.duth.gr; Tel.: +302541079688

## Supplementary Material Content:

**Figure S1.** Comparison of field surveyed landslides with automatic satellite mapping results (a-g). Left: field photos (acquired October 1-3 2020); right: location map with automatic satellite mapping results (HazMapper [1]). Blue dots show mapped landslides from Sentinel-2 images and triangles with letter marking field locations of surveyed landslides. Location map for sites a-g (h) with Sentinel-2 landslides (orange).

**Figure S2.** Automatic satellite mapping results. Left: method results; middle: method results with mapped landslides (blue dots) and field survey locations (orange triangles); right: Sentinel-2 true colour image, acquired in September 30, 2020.

## References

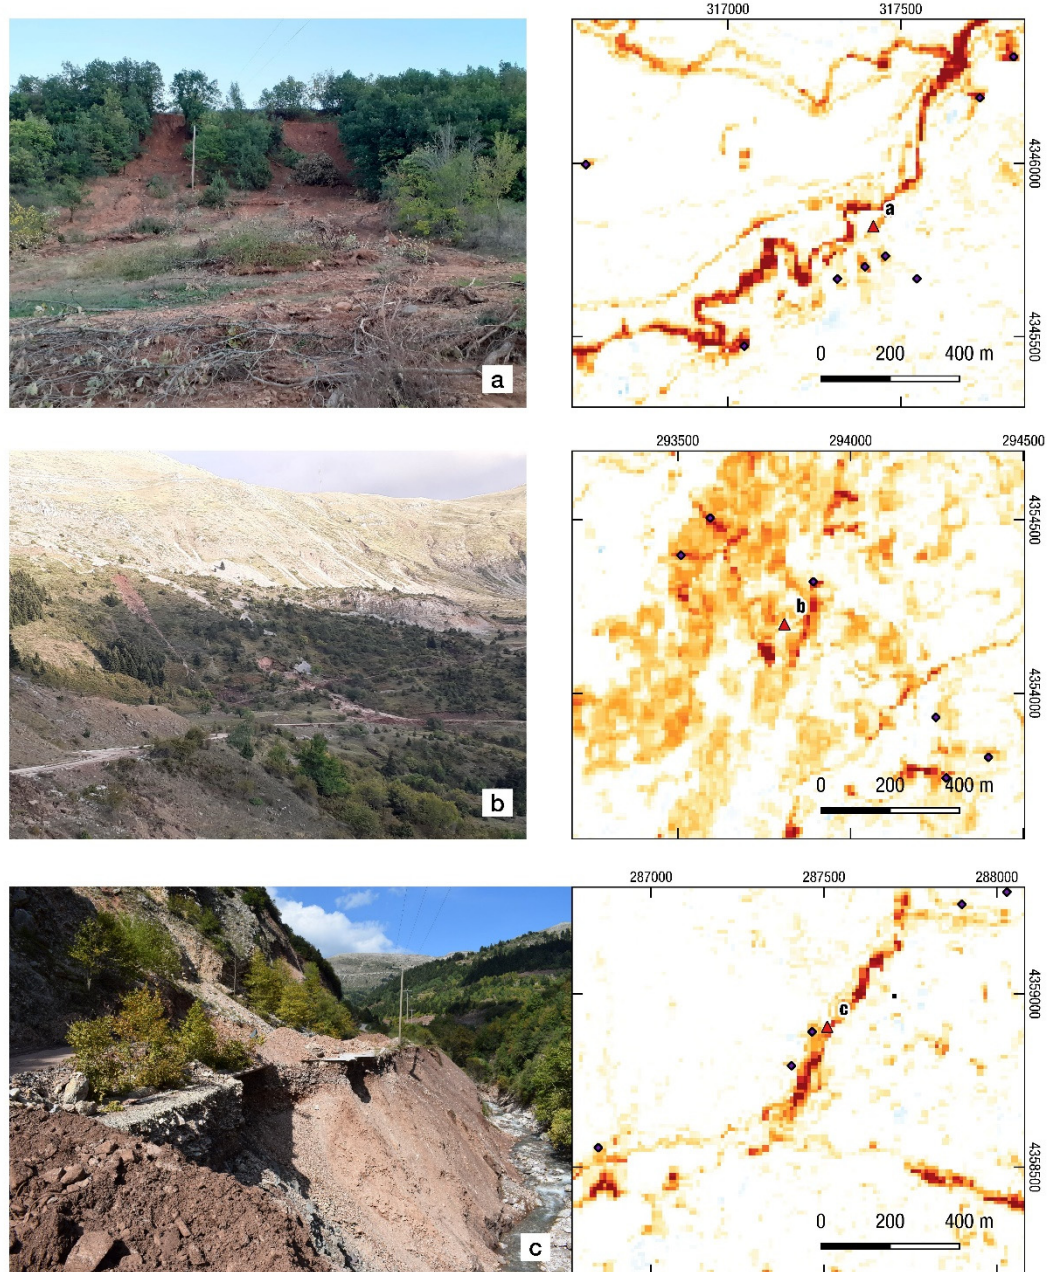

**Figure S1.** (a). *Continued.*

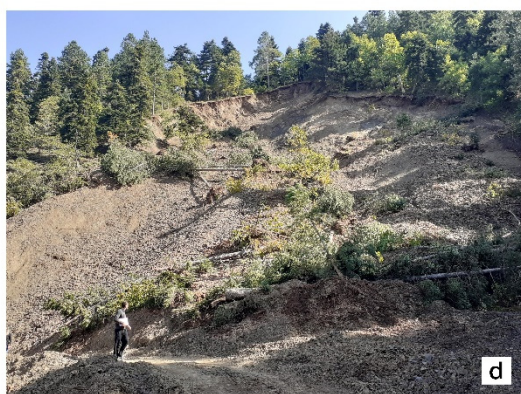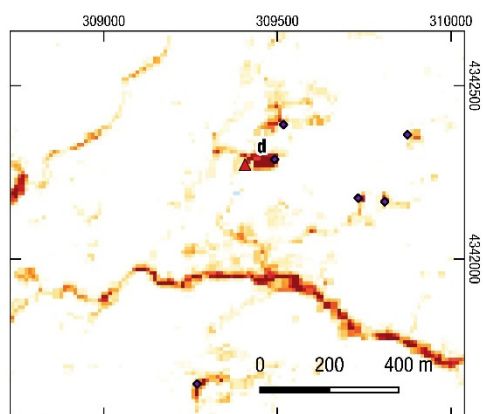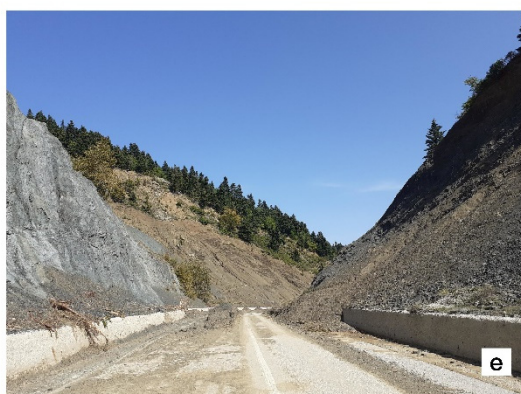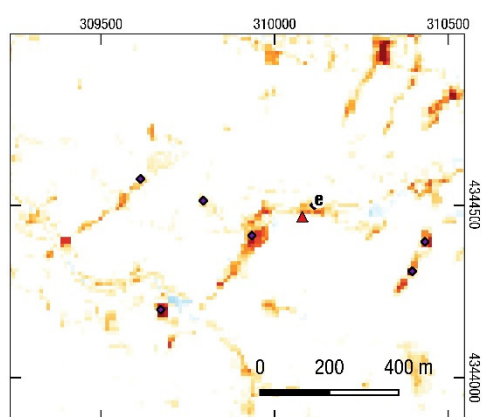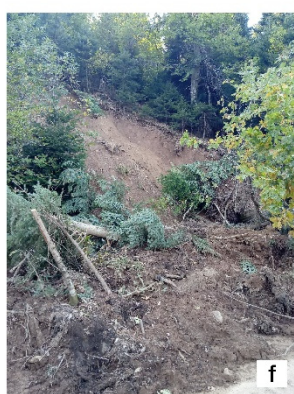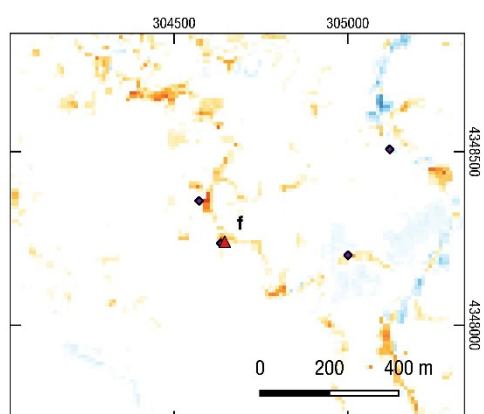

**Figure S1.** (b). *Continued.*



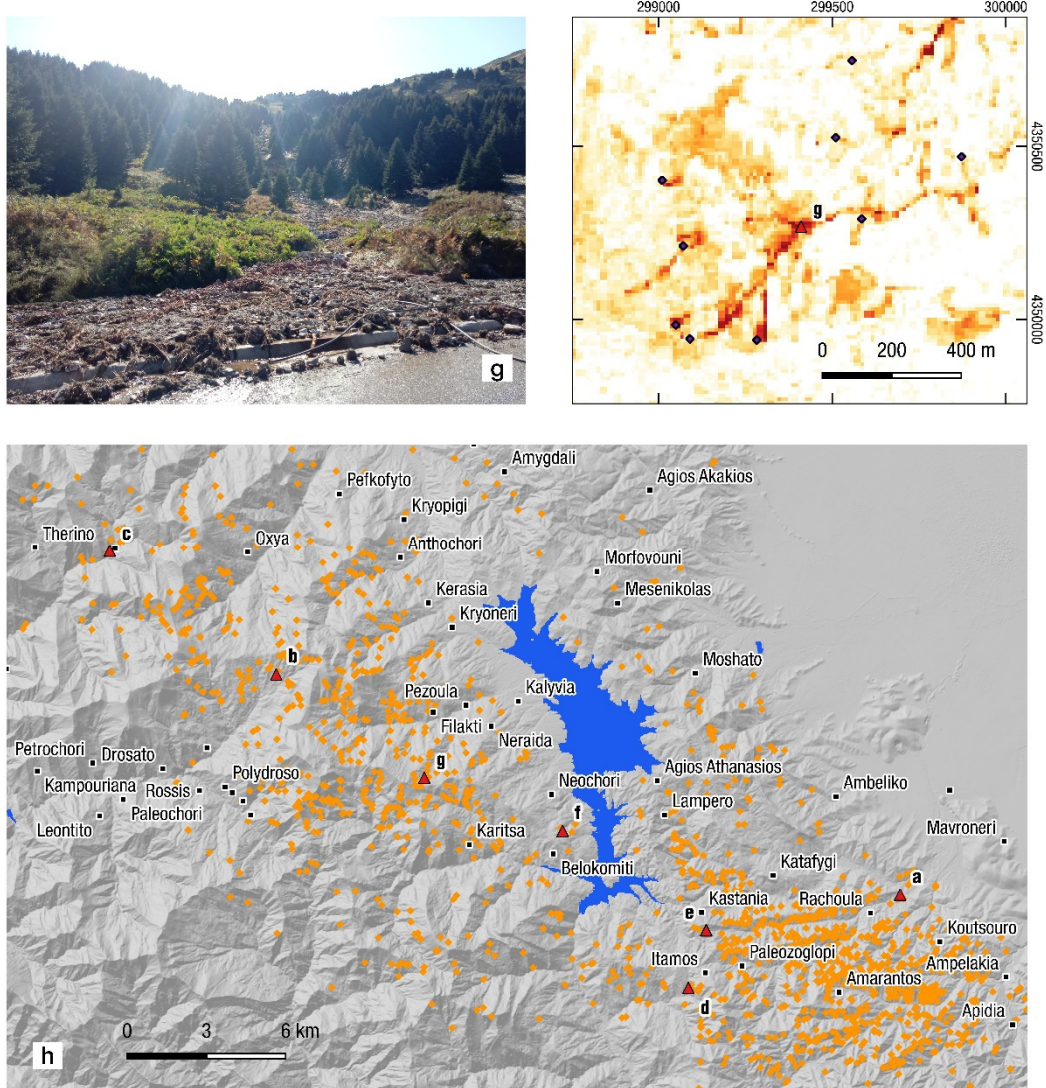

**Figure S1. c).** Comparison of field surveyed landslides with automatic satellite mapping results (a-g). Left: field photos (acquired October 1-3 2020); right; location map with automatic satellite mapping results (HazMapper [1]). Blue dots show mapped landslides from Sentinel-2 images and triangles with letter marking field locations of surveyed landslides. Location map for sites a-g (h) with Sentinel-2 landslides (orange).



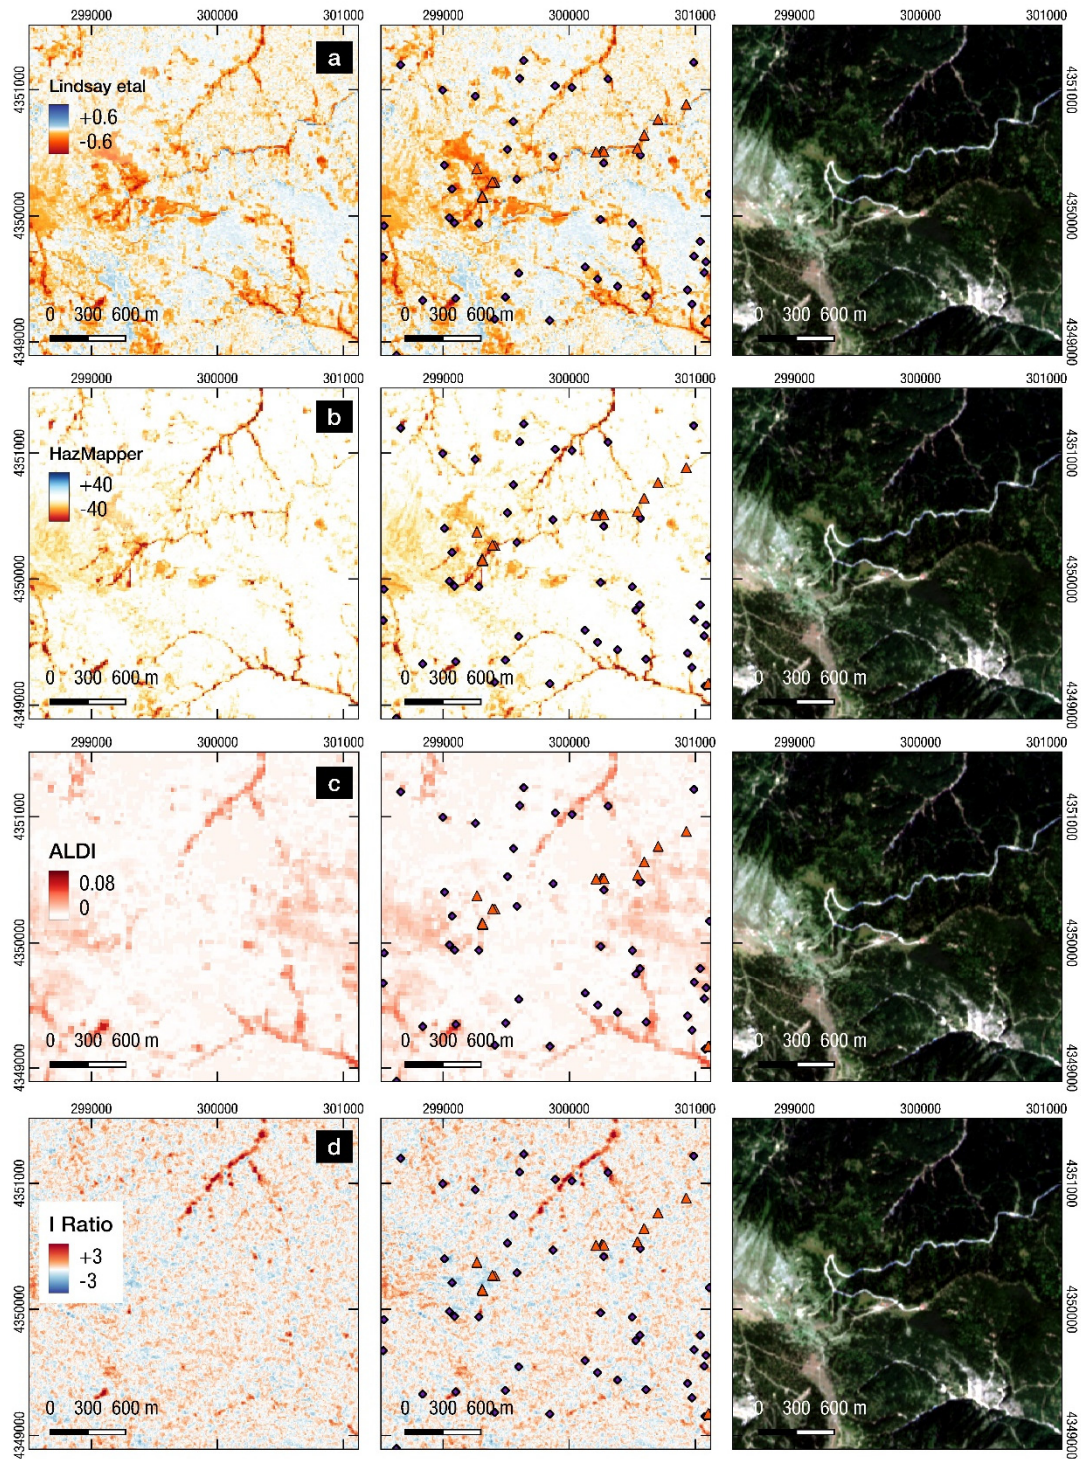

**Figure S2.** Automatic satellite mapping results. Left: method results; middle: method results with mapped landslides (blue dots) and field survey locations (orange triangles); right: Sentinel-2 true colour image, acquired in September 30, 2020.

## References

1. Scheip, C.M., Wegmann, K.W. HazMapper: a global open-source natural hazard mapping application in Google Earth Engine. *Nat. Hazards Earth Syst. Sci.* **2021**, 21, 1495-1511.
2. Lindsay, E., Frauenfelder, R., Rüther, D., Nava, L., Rubensdotter, L., Strout, J., Nordal, S. Multi-Temporal Satellite Image Composites in Google Earth Engine for Improved Landslide Visibility: A Case Study of a Glacial Landscape. *Remote Sens.* **2022**, 14, 2301.
3. Milledge, D.G., Bellugi, D.G., Watt, J., Densmore, A.L. Automated determination of landslide locations after large trigger events: advantages and disadvantages compared to manual mapping. *Nat. Hazards Earth Syst. Sci.* **2022**, 22, 481-508.
4. Handwerger, A.L., Huang, M-H., Jones, S.Y., Amatya, P., Kerner, H.R., Kirschbaum, D.B. Generating landslide density heatmaps for rapid detection using open-access satellite radar data in Google Earth Engine. *Nat. Hazards Earth Syst. Sci.* **2022**, 22, 753-773.
